# Supplementary material for: The Effect of Appearance-Related Social Media Consciousness on Body Image, Internalization of Ideals, and Psychological Development in Adolescents
Source: Research Square preprint supplement (doi:10.21203/rs.3.rs-5998050/v1), 2025-11-03
Supplement: Supplementary file 1 [file e010c43f4b90bc2f21f3d523.docx]

Table 1. Demographic characteristics of the adolescents participating in the study.

| **Variable** | **Group** | **Number** (**n)** | **Percentage** (**%)** |
| --- | --- | --- | --- |
| **Gender** | Female | 798 | 48.6 |
| Male | 843 | 51.4 |
| **Age** | 14 | 412 | 25.2 |
| 15 | 404 | 24.6 |
| 16 | 375 | 22.9 |
| 17 | 450 | 27.4 |
| **Grade** | 9th | 430 | 26.2 |
| 10th | 390 | 23.8 |
| 11th | 338 | 20.6 |
| 12th | 483 | 29.4 |
| **Mother’s Education Status** | Illiterate | 34 | 2.1 |
| Primary School | 402 | 24.5 |
| Secondary School | 335 | 20.4 |
| High School | 450 | 27.4 |
| Associate Degree/Bachelor | 322 | 19.6 |
| Postgraduate | 98 | 6.0 |
| **Father’s Education Status** | Illiterate | 14 | .9 |
| Primary School | 223 | 13.6 |
| Secondary School | 270 | 16.5 |
| High School | 544 | 33.2 |
| Associate Degree/Bachelor | 462 | 28.2 |
| Postgraduate | 128 | 7.8 |
| **Type of high school** | Science High School | 233 | 14.2 |
| Anatolian High School | 353 | 21.5 |
| Social Science High School | 249 | 15.2 |
| Religios High School | 219 | 13.3 |
| Arts High School | 197 | 12.0 |
| Private High School | 145 | 8.8 |
| MTAL | 245 | 14.9 |
| **Family income level** | Low income | 79 | 4.8 |
| Below average income | 150 | 9.1 |
| Medium income | 862 | 52.5 |
| Above average income | 446 | 27.2 |
| High income | 104 | 6.3 |
| **Most frequently used social media tool** | Facebook | 11 | .7 |
| Instagram | 1031 | 62.8 |
| X | 40 | 2.4 |
| Snapchat | 45 | 2.7 |
| Tiktok | 233 | 14.2 |
| Other | 281 | 17.1 |
| **Time spent on social media during the day** | less than 1 hour | 301 | 18.3 |
| 1-2 hours | 423 | 25.8 |
| 3-4 hours | 492 | 30.0 |
| 5-6 hours | 252 | 15.4 |
| 7-8 hours | 98 | 6.0 |
| more than 9 hours | 75 | 4.6 |
| **Number of followers on the most frequently used social media platform** | 0-100 | 744 | 45.3 |
| 101-250 | 465 | 28.3 |
| 251-500 | 237 | 14.4 |
| 501-1000 | 104 | 6.3 |
| more than 1000 | 91 | 5.5 |
| **Comparing the image of people seen on social media with their own image** | never | 732 | 44.6 |
| occasionally | 350 | 21.3 |
| sometimes | 323 | 19.7 |
| frequently | 131 | 8.0 |
| allways | 105 | 6.4 |
|  | **Total** | **1641** | **100.0** |

Table 2. Descriptive statistics

| **Variables** | **n** | **Min.** | **Max.** | **X** | **SS** |
| --- | --- | --- | --- | --- | --- |
| Body Image Scale | 1641 | 1.00 | 5.00 | 2.4022 | .78213 |
| Adolescent Psychological Development Scale | 1641 | 1.07 | 5.00 | 3.0775 | .66790 |
| Appearance-Related Social Media Consciousness Scale | 1641 | 1.00 | 7.00 | 3.0565 | 1.31935 |
| Internalization of Ideals Scale | 1641 | 1.00 | 10.00 | 6.7471 | 1.90761 |

Table 3. Results of Pearson correlation analysis for the variables.

|  | **Variables** | 1 | 2 | 3 | 4 |
| --- | --- | --- | --- | --- | --- |
| 1 | Body Image Scale | 1 | .456** | .441** | .114** |
| 2 | Adolescent Psychological Development Scale |  | 1 | .244** | .027 |
| 3 | Appearance-Related Social Media Consciousness Scale |  |  | 1 | .338** |
| 4 | Internalization of Ideals Scale |  |  |  | 1 |

**P< 0.01.

Table4. Effect Analysis of appearance-related social media consciousness on body image in adolescents

| Variable | B | Beta | t | Sig. | VIF | R | R2 | Adjusted R2 | F |
| --- | --- | --- | --- | --- | --- | --- | --- | --- | --- |
| Constant | 1.603 |  | 36.644 | .000 |  | .441a | .194 | .194 | .000b |
| ASMC | .261 | .441 | 19.889 | .000 | 1.000 |

Table 5. Effect Analysis of appearance-related social media consciousness on internalization of ideals in adolescents

| Variable | B | Beta | t | Sig. | VIF | R | R2 | Adjusted R2 | F |
| --- | --- | --- | --- | --- | --- | --- | --- | --- | --- |
| Constant | 5.254 |  | 46.955 | .000 |  | .338a | .114 | .114 | .000b |
| ASMC | .488 | .338 | 14.528 | .000 | 1.000 |

Table6. Effect Analysis of appearance-related social media consciousness on psychological development in adolescents

| Variable | B | Beta | t | Sig. | VIF | R | R2 | Adjusted  R2 | F |
| --- | --- | --- | --- | --- | --- | --- | --- | --- | --- |
| Constant | 2.700 |  | 66.882 | .000 |  | .244a | .060 | .059 | .000b |
| ASMC | .124 | .244 | 10.188 | .000 | 1.000 |
